# Supplementary material for: Block copolymers from ionic liquids for the preparation of thin carbonaceous shells
Source: publisher site journal article supplement (doi:10.3762/bjoc.13.163), 2017-08-16
Supplement: Additional file 1 [file 1860-5397-13-163-S1.pdf]

# **Supporting Information**

**for**

## **Block copolymers from ionic liquids for the preparation of thin carbonaceous shells**

Sadaf Hanif, Bernd Oschmann, Dmitri Spetter, Muhammad Nawaz Tahir, Wolfgang Tremel and Rudolf Zentel\*

Address: Institute for Organic Chemistry, University of Mainz, Duesbergweg 10-14, 55128 Mainz, Germany

Email: Prof. R. Zentel\* - zentel@uni-mainz.de

\*Corresponding author

### **Additional spectra**

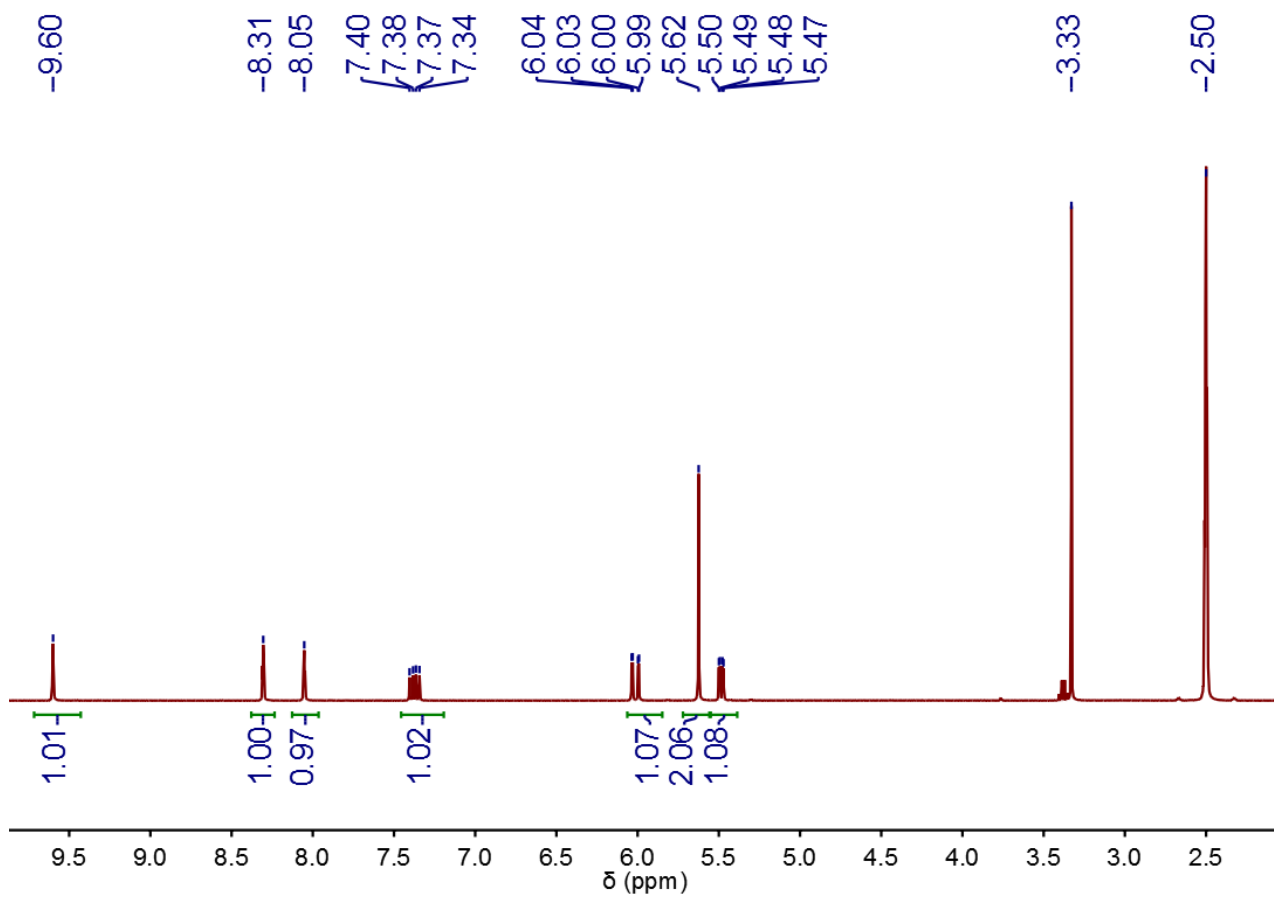

**Figure S1:**  $^1\text{H}$  NMR of 1-vinyl-3-cyanomethylimidazolium bromide, measured in  $\text{DMSO-}d_6$ .

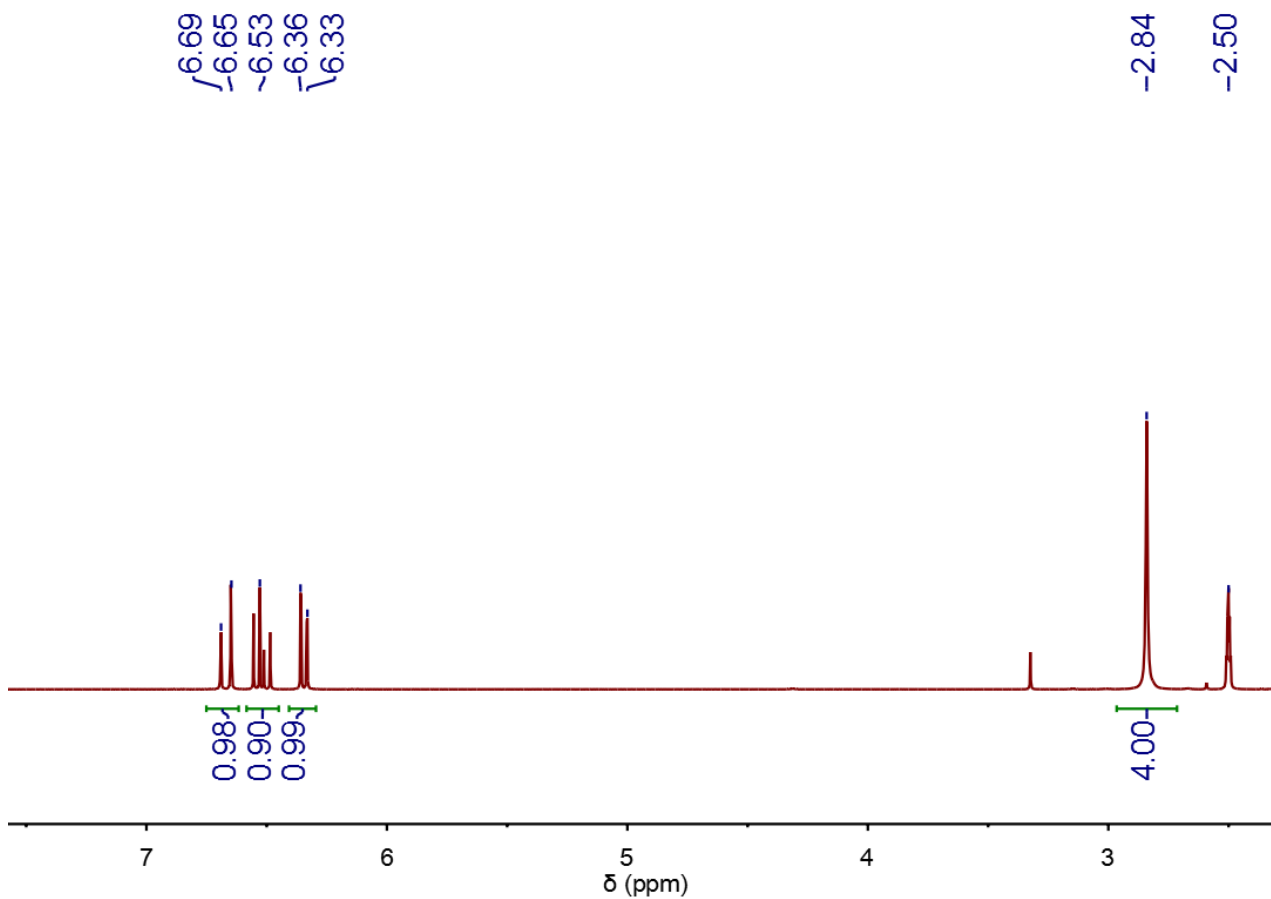

**Figure S2:** <sup>1</sup>H NMR of NAS, measured in DMSO-*d*<sub>6</sub>.

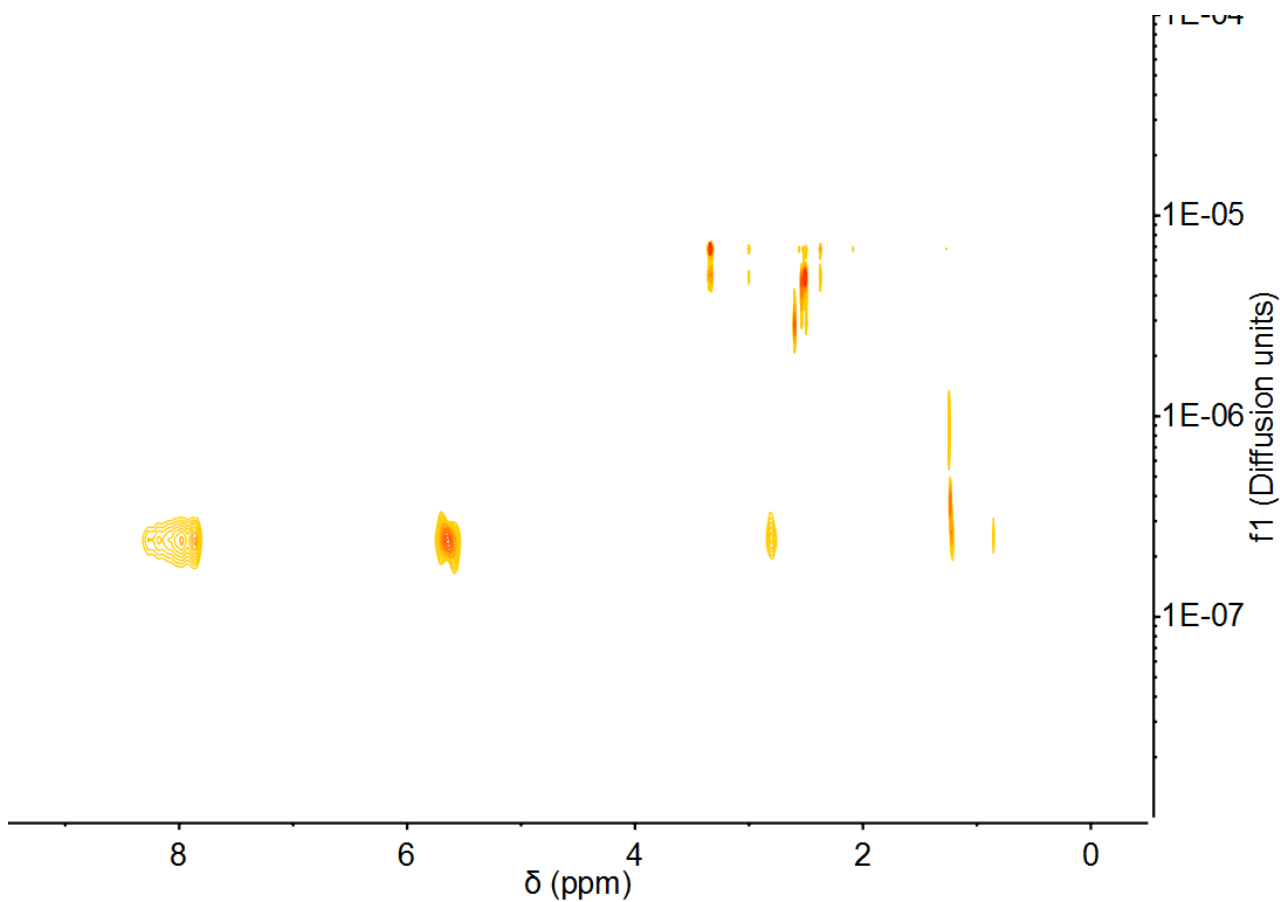

**Figure S3:** DOSY of the block copolymer **PB**. The spectrum shows just one polymeric species. DMSO and traces of water are also apparent, since the spectrum was measured in  $\text{DMSO-}d_6$ .

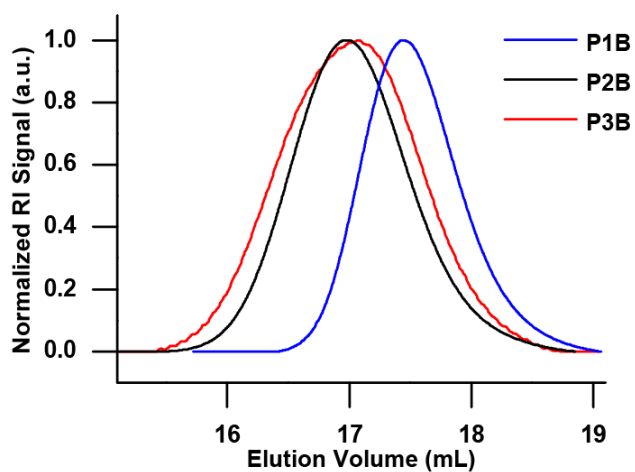

**Figure S4:** SEC of **P1B** (blue), **P2B** (black), **P3B** (red) measured in HFIP.

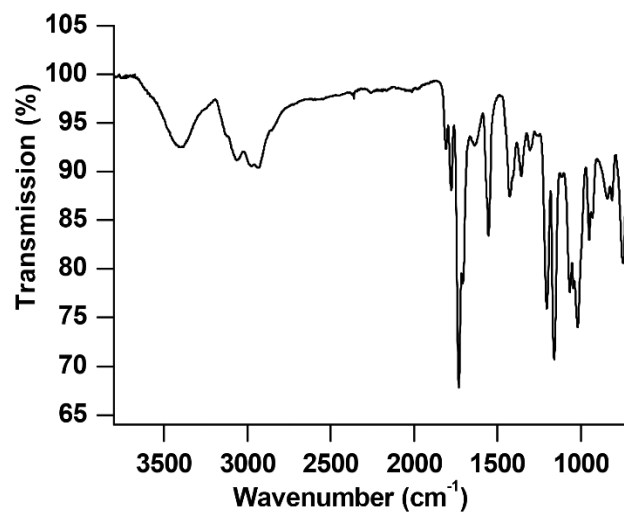

**Figure S5:** IR spectrum of the block copolymer **PB**.

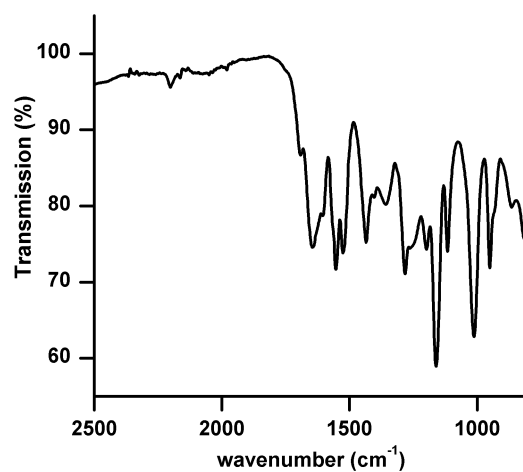

**Figure S6:** IR spectrum of the block copolymer after post polymerization modification (**PC**).
